# Supplementary material
Source: publisher figshare collection journal article supplement (https://acs.figshare.com/ndownloader/files/5672916)
Supplement: Supplementary file 1 [file 5672916]

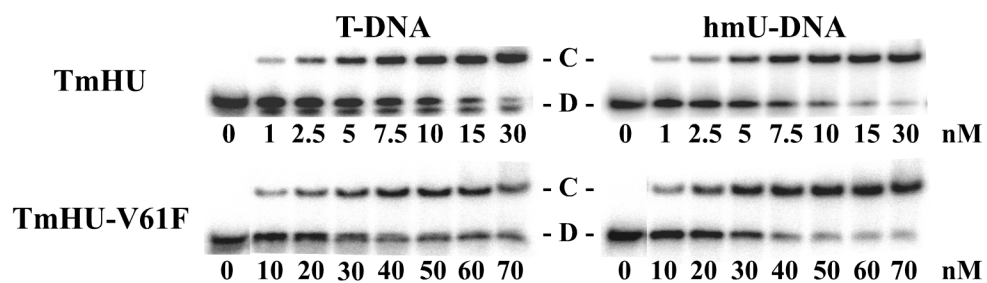

Titrations of TmHU and TmHU-V61F with 37 bp T-containing DNA (left panel) and hmU-containing DNA (right panel). TmHU variants are identified at the left, and protein concentrations are indicated below each panel. Complex (C) and free DNA (D) is identified between the panels.
